# Supplementary material for: Influence of alkalinity on the synthesis of hierarchical LTA zeolite by using bridged polysilsesquioxane
Source: Royal Society of Chemistry journal article supplement (doi:10.1039/c8ra08952c), 2019-01-01
Supplement: c8ra08952c1.pdf [file c8ra08952c1.pdf]

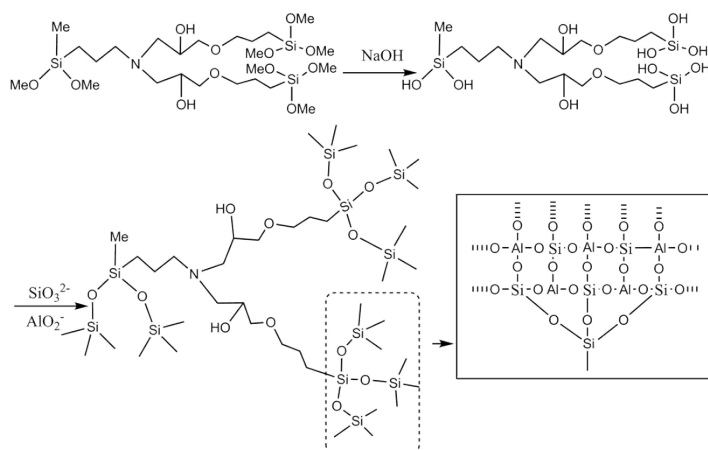

Scheme S1 Hydrolysis behavior and condensation mechanism of bridged polysilsesquioxane with silicate solution.

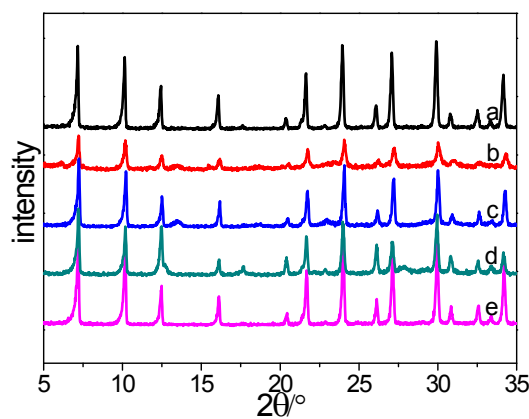

Fig. S1 Powder X-ray diffraction patterns for Ca-A and Ca-MA-x zeolites: a:Ca-A-0; b: Ca-MA-1; c: Ca-MA-2; d: Ca-MA-3; e: Ca-MA-4.
